# Supplementary material for: Protoplast isolation prior to flow cytometry reveals clear patterns of endoreduplication in potato tubers, related species, and some starchy root crops
Source: PubMed Central journal article supplement (PMC5391561; doi:10.1186/s13007-017-0177-3), 2017-04-14
Supplement: 13007_2017_177_MOESM1_ESM.pdf [file 13007_2017_177_MOESM1_ESM.pdf]

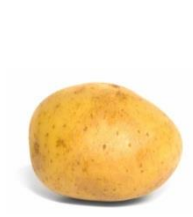

Surface sterilize & core tuber

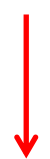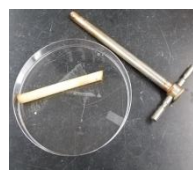

Slice core and place in plasmolysis solution, incubate overnight 4 °C

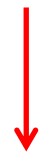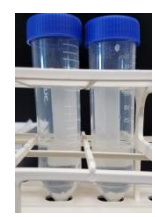

Remove plasmolysis solution, add enzyme solution, incubate overnight 28 °C

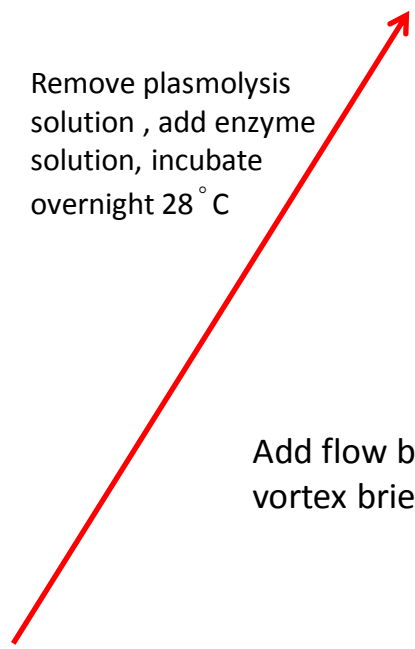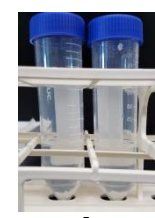

Wash and remove all wash solution

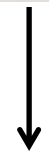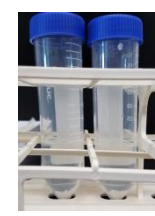

Add flow buffer, vortex briefly

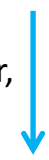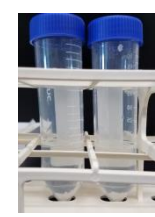

Filter, 106 µm mesh

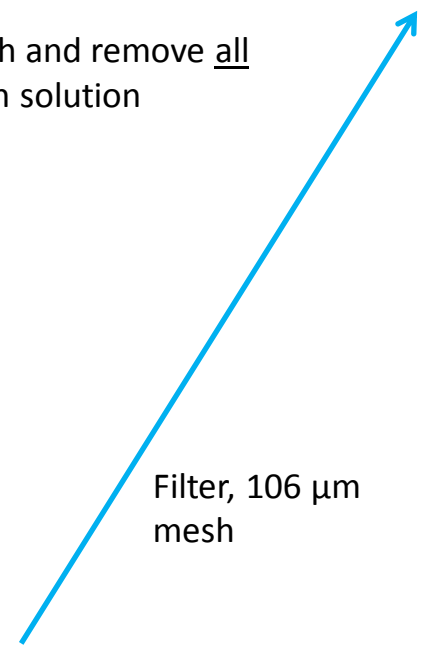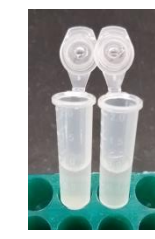

Add RNase, Incubate

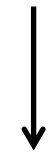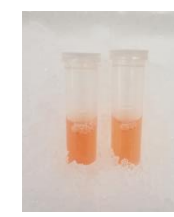

Add PI, Incubate

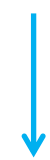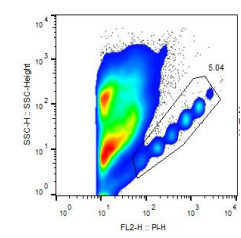

Flow Cytometry

- Room temp, Aseptic
- Room temp, Non-aseptic
- On ice, Non-aseptic
